1 **A systematic survey of PRMT interactomes reveals the key**  
2 **roles of arginine methylation in the global control of RNA**  
3 **splicing and translation**

4

5 Huan-Huan Wei <sup>1,\*</sup>, Xiao-Juan Fan <sup>1</sup>, Yue Hu <sup>1</sup>, Meng Guo <sup>1,4</sup>, Zhao-Yuan Fang <sup>1</sup>, Ping Wu <sup>2,3</sup>,

6 Xiao-Xu Tian <sup>2,3</sup>, Shuai-Xin Gao <sup>2,3</sup>, Chao Peng <sup>2,3</sup>, Yun Yang <sup>1</sup>, Zefeng Wang <sup>1,\*</sup>

7 1. CAS Key Laboratory of Computational Biology, CAS-MPG Partner Institute for  
8 Computational Biology, Shanghai Institute of Nutrition and Health, CAS Center for Excellence  
9 in Molecular Cell Science, Shanghai Institutes for Biological Sciences, University of Chinese  
10 Academy of Sciences, Chinese Academy of Sciences, Shanghai 200031, China

11 2. National Facility for Protein Science in Shanghai, Zhangjiang Lab, Shanghai 201210,  
12 China.

13 3. Shanghai Science Research Center, Chinese Academy of Sciences, Shanghai, 201204,  
14 China.

15 4. XiJing hospital of Digestive Diseases, Fourth Military Medical University, XiAn, ShanXi  
16 710000, China.

17

18 \* Corresponding to: [wangzefeng@picb.ac.cn](mailto:wangzefeng@picb.ac.cn), [weihuanhuan@picb.ac.cn](mailto:weihuanhuan@picb.ac.cn)

19

1 **Abstract**

2 Arginine methylation, catalyzed by various protein arginine  
3 methyltransferases (PRMTs), is increasingly recognized as a widespread  
4 post-translational modification in eukaryotes. Thousands of proteins undergo  
5 arginine methylation, however, a full picture of the catalytic network for each  
6 PRMT is lacking, limiting the global understanding of their biological roles. In  
7 this study, we reported a systematic identification of interacting proteins for all  
8 human PRMTs, and the resulting interactomes are significantly overlapped  
9 with the known proteins containing methylarginine. The conserved motifs for  
10 arginine methylation by each PRMT were further determined, with several  
11 novel motifs being validated. Among different PRMTs, we found a high degree  
12 of overlap in their substrates and high similarities between their putative  
13 methylation motifs, suggesting possible functional complementation. We  
14 demonstrated that arginine methylation is significantly enriched in RNA binding  
15 proteins involved in regulating RNA splicing and translation. Consistently,  
16 inhibition of PRMTs leads to global alteration of alternative splicing and  
17 suppression of translation. In particular, the ribosomal proteins are pervasively  
18 modified with methylarginine, and the mutations on methylation sites inhibit  
19 ribosome assembly and translation. Collectively, this study provides a global  
20 network of different PRMTs and putative substrates, revealing critical functions  
21 of arginine methylation in the regulation of mRNA splicing and translation.

22

1 **Keywords**

2 Protein arginine methyltransferase (PRMT), Arginine methylation,  
3 Post-translational modification (PTM), RNA-binding protein (RBP), alternative  
4 splicing, mRNA translation

5

6

## 1 **Introduction**

2 Arginine N-methylation was first discovered in the early 1970s (Paik and  
3 Kim 1970; Baldwin and Carnegie 1971; Kakimoto 1971) and later was  
4 recognized as a widespread post-translational modification (PTM) in many  
5 proteins (Gary and Clarke 1998; Ong et al. 2004; Bedford and Richard 2005;  
6 Pahlich et al. 2006; Bedford 2007; Blanc and Richard 2017). It is catalyzed by  
7 a class of enzymes known as protein arginine methyltransferases (PRMTs),  
8 which covalently link methyl groups to the arginine side chains. Although  
9 arginine methylation does not alter the electric charge of arginine, it increases  
10 amino acid bulkiness and protein hydrophobicity, thus can affect how proteins  
11 interact with their partners. This type of PTM has been found to play key roles  
12 in various cellular processes, including DNA damage repair, transcriptional  
13 regulation, RNA metabolism, etc. (Bedford and Richard 2005; Pahlich et al.  
14 2006; Bedford 2007; Sylvestersen et al. 2014; Blanc and Richard 2017; Peng  
15 and Wong 2017). As a result, arginine methylation has a profound effect on  
16 human diseases such as cancer (Yang and Bedford 2013; Poulard et al. 2016;  
17 Blanc and Richard 2017) and cardiovascular diseases (Stuhlinger et al. 2001).

18 Nine PRMTs, PRMT1 to PRMT9, have been identified in the human  
19 genome (Fig. 1A), which were classified into three types according to the final  
20 methylarginine products. Type I PRMTs, including PRMT1, 2, 3, 4, 6, and 8,  
21 catalyze the formation of  $\omega$ -N<sup>G</sup>, N<sup>G</sup>-asymmetric dimethylarginine (aDMA).  
22 Type II PRMTs, including PRMT5 and PRMT9, catalyze the formation of  $\omega$ -N<sup>G</sup>,

1 N<sup>G</sup>-symmetric dimethylarginine (sDMA). PRMT7 is the only type III PRMT and  
2 catalyzes ω-N<sup>G</sup>-monomethylarginine (MMA). Methylation of arginine by  
3 PRMTs consumes a great deal of cellular energy (12 ATPs for each methyl  
4 group added) (Gary and Clarke 1998) and is found in >10% of all human  
5 proteins (Larsen et al. 2016), implying an essential role of arginine methylation  
6 in cell growth and proliferation.

7 The biological functions of PRMTs are largely determined by its substrates  
8 and regulating partners, and therefore identifying the full scope of the  
9 interactors for each PRMT will greatly improve our understanding of the  
10 function of arginine methylation. The substrates of several individual PRMTs  
11 (e.g., PRMT4 and PRMT5) have been determined using various approaches,  
12 however, the substrates or interactors of other PRMTs remain largely unknown.  
13 On the other hand, thousands of human proteins have been identified to  
14 undergo arginine methylation using mass spectrometry combined with specific  
15 methylarginine antibodies (Guo et al. 2014; Larsen et al. 2016), and thus it will  
16 be highly valuable to connect these proteins with the PRMTs that catalyze their  
17 methylation.

18 In this study, we systematically identified interactome of each PRMT using  
19 BioID that allows identification of transient protein-protein interactions (Roux et  
20 al. 2012; Roux et al. 2013; Roux et al. 2018), and further determined the  
21 substrate specificity and consensus arginine methylation motifs of each PRMT.  
22 Our results showed a high degree of overlap in substrate specificity of different

1 PRMTs, suggesting a possible functional complementation. Remarkably,  
2 PRMT interactors are significantly enriched for RNA binding proteins involved  
3 in mRNA splicing and translation, and inhibition of PRMTs leads to global  
4 alteration of alternative splicing and reduction of mRNA translation. We also  
5 found that the mutations on methylation site of ribosomal proteins inhibited  
6 ribosome assembly. Collectively, this study provides new insight into biological  
7 functions of PRMTs and links each PRMT and arginine methylation events in a  
8 systematic manner, revealing critical functions of arginine methylation in  
9 regulation of RNA metabolism.

10

## 1 **Results**

### 2 **Identification of the interacting proteins of each PRMT**

3 As catalytic enzymes, the interaction between PRMTs and their  
4 substrates are usually dynamic, making it difficult to identify the interacting  
5 partners. To systematically characterize interactome of different PRMTs *in vivo*,  
6 we applied the highly sensitive BioID technology to label interacting proteins  
7 with biotin. Based on previous reports that N-terminus of PRMT is responsible  
8 for substrate recognition (Tang et al. 1998; Frankel and Clarke 2000; Goulet et  
9 al. 2007; Shishkova et al. 2017), we fused a promiscuous biotin ligase BirA\*  
10 (BirA<sup>R118G</sup>) to the C-terminus of each PRMT and expressed the fusion proteins  
11 in HEK293T cells. Biotinylated proteins were subsequently purified with  
12 streptavidin beads followed by mass spectrometry analysis (Fig. 1B, and  
13 experimental procedures). As expected, many purified proteins are indeed  
14 biotinylated as judged by western blot (Fig. 1C, left), with the PRMTs  
15 themselves being the most heavily biotinylated proteins (Fig. 1C, right).

16 In total, we have identified 1657 candidate proteins bound by at least one  
17 of the nine PRMTs (Table S1 and Fig. S1A), a lot of which overlapped with the  
18 proteins identified in the earlier proteomic studies using immunoprecipitation  
19 with antibodies against methylarginine-containing oligopeptides (Guo et al.  
20 2014; Larsen et al. 2016) (Fig. 1D), indicating the BioID technology is reliable  
21 and sensitive in identifying PRMT interactors.

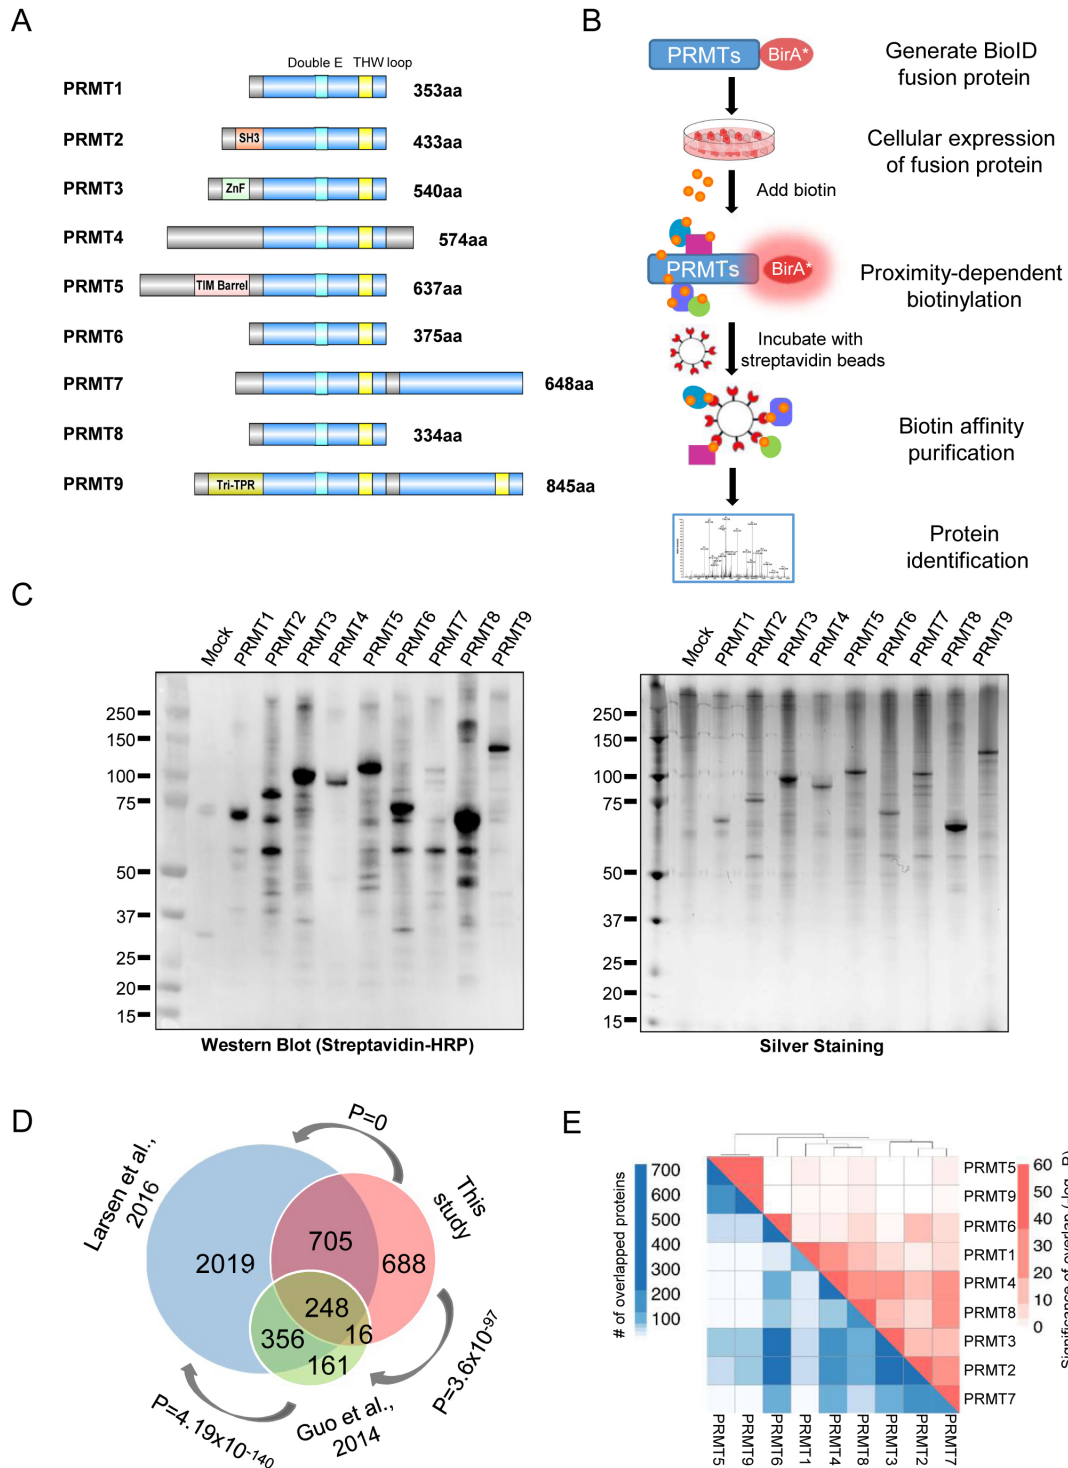

1

2

3

**Figure 1. Systematic identification of PRMT interactome.**

4

(A) Schematic diagram of PRMT1 to PRMT9. The light blue boxes represent the catalytic domains, the

5

cyan and yellow boxes represent Double E Motifs and THW loop Motifs that are specific to PRMTs,

6

respectively. (B) The workflow for identification of PRMT interacting proteins via BioID. (C) The

7

biotinylated PRMT interacting proteins as detected by western blot using streptavidin-HRP (left) and by

8

silver staining (right). (D) The Venn diagram illustrating the PRMT interactome from this study compared

9

to methylarginine-containing proteins identified in Larsen et al., 2016 and Guo et al., 2014. The



1 correlation is calculated by Fisher's exact test, with the whole genome as the background. (E) The  
2 overlap of the interactome among different PRMTs. Fishers' exact test is used to calculate the  $p$ -value of  
3 the overlap. The PRMT interactomes are clustered by overlap significance (shown in red) and the  
4 numbers of overlapped protein are indicated in blue.

5

6 In addition to the methylation substrates, the interactome of PRMTs may  
7 also include proteins that regulate PRMT functions, which could not be  
8 identified by immunoprecipitation with methylarginine antibodies. For example,  
9 PRMT5 exerts arginine methyltransferase function in the form of a complex  
10 with MEP50 (WDR77) (Saha et al. 2016), a co-factor that was also identified in  
11 the PRMT5 interactome by our experiments. Importantly, only 4% of newly  
12 identified PRMT interacting proteins (70 out of 1657 proteins) have been  
13 collected in the IntAct online PPI database (<https://www.ebi.ac.uk/intact/>),  
14 suggesting that our results significantly expanded the interactome of each  
15 PRMT (Fig. S1B).

16

### 17 **Substrate preference of individual PRMTs**

18 To further determine the substrate preference of the putative substrates for  
19 different PRMTs, we compared the newly identified putative substrates for  
20 each PRMT. Our results indicated that many proteins are recognized by  
21 multiple PRMTs, suggesting a great deal of substrate redundancy for each  
22 PRMT (Fig. S1C). For example, RPS3 can be recognized by all 9 PRMTs as  
23 judged by our results, and 372 proteins can be recognized by at least 3 out of 9  
24 PRMTs tested (Fig. S1D). We further examined the overlaps of the interacting

1 proteins between each PRMT (Fig. 1E), and found that the PRMTs can be  
2 roughly clustered into two groups based on the similarity of their interactomes.  
3 Interestingly, such classification reflects the differences in the dimethylation  
4 step of PRMT-catalyzed reactions, with the type II PRMTs (PRMT5 and  
5 PRMT9) that catalyze symmetric arginine dimethylation being separated from  
6 the other PRMTs that either catalyze asymmetric arginine dimethylation (type I)  
7 or does not catalyze dimethylation (PRMT7, type III).

8

## 9 **Identification and validation of consensus motifs for arginine** 10 **methylation**

11 Previous studies have reported that the glycine and arginine rich (GR-rich)  
12 motifs are preferably targeted for methylation by many PRMTs (including  
13 PRMT1, PRMT3, PRMT5, PRMT6, and PRMT8) (Bedford and Clarke 2009;  
14 Thandapani et al. 2013; Blanc and Richard 2017). However, additional  
15 consensus motifs such as proline/glycine/methionine rich (PGM-rich) or RxR  
16 motifs were also found to be enriched near the methylarginine sites by mass  
17 spectrometry (Cheng et al. 2007; Feng et al. 2013), suggesting that other  
18 sequences beside GR-rich motifs may also be recognized as arginine  
19 methylation sites and that individual PRMTs may have different preferences of  
20 their substrate.



1 consensus motifs were listed besides each group. (C) A summary of all enriched motifs found in each  
2 PRMT interactome. Similar motifs are placed in the same concentric circle. (D) The experimental  
3 workflow of *in vitro* methylation and identification of methylarginine-containing peptides. R<sup>Me</sup> and R<sup>2Me</sup> are  
4 set as dynamic modifications with a mass shift of 14.01565 and 28.0313. (E) The arginine methylation  
5 pattern of two representative peptides in SR-rich and PR-rich motifs as detected by mass spectrum. In  
6 each case, the upper spectrum indicates the negative control without adding enzymes, and the lower  
7 spectrum shows the methylarginine signals after *in vitro* methylation. For each peptide, the ratio of  
8 methylation was calculated as the sum of the peak areas from the TIC values of the modified peptides  
9 divided by the peak area of the total peptides. The methylarginines were labeled in red font.

10

11 To further determine the substrate preference for different enzymes, we  
12 analyzed the newly identified putative PRMT substrates by measuring the  
13 statistic enrichment of the sequences around the potential methylarginine (Fig.  
14 2A, see methods for details). For each PRMT, the tetrapeptides around the  
15 potential methylarginine sites were compared with the arginine-containing  
16 tetrapeptides in all proteins from UniProt database to calculate the enrichment  
17 Z-scores (Fig. 2A). The enriched tetrapeptides were further clustered into  
18 different groups to obtain consensus motifs for arginine methylation by each  
19 PRMT. As an example, the clusters and the consensus motifs for PRMT4  
20 substrates were shown in Fig. 2B and the clusters of all PRMTs were shown in  
21 supplementary figure S2. We further compared the consensus motifs of all  
22 tested PRMTs (Fig. 2C), and found that in addition to the known RGG motifs  
23 from the substrates of many PRMTs, several other new consensus motifs like  
24 SR-rich, PR-rich, DR-rich, and ER-rich motifs were also be identified in PRMT  
25 substrates. These results provided a comprehensive profile for the substrate  
26 preference of different PRMTs, suggesting that a diverse range of proteins  
27 could be potentially modified by PRMTs at different consensus motifs.

1           In order to validate these newly identified arginine methylation motifs, we  
2 selectively synthesized several peptides containing newly identified consensus  
3 motifs to measure methylation of arginine by the cognate PRMTs using *in vitro*  
4 methylation reaction (Fig. 2D). The peptides were incubated with purified  
5 PRMTs (Fig. S3A and S3B) in the presence of methyl donor  
6 S-adenosylmethionine, and resulting samples were analyzed with mass  
7 spectrometry. As a positive control, the GR-rich motifs known to be heavily  
8 methylated were confirmed in our *in vitro* methylation assay (not shown). In  
9 addition, we found that the arginine residues within the SR-rich, PR-rich, and  
10 DR-rich motifs can be robustly methylated by different PRMTs, with both  
11 methylation and dimethylation being detected (Fig. 2E, Fig. S3C), indicating  
12 that these newly identified consensus motifs can indeed be methylated at the  
13 arginine sites.

14

### 15 **Potential functions of PRMT substrates**

16           To examine the functional consequence of arginine methylation, we  
17 inferred the potential functions of the newly identified substrates using gene  
18 ontology (GO) analyses (<https://david.ncifcrf.gov/>) (Huang da et al. 2009a;  
19 Huang da et al. 2009b). In order to increase the specificity of our analysis  
20 and reduce the statistic noises from the large number of potential substrates,  
21 we first focused on the proteins that were identified in both our dataset and  
22 from earlier reports of methylarginine-containing proteins (Guo et al. 2014;

1 Larsen et al. 2016). We found that these proteins were significantly enriched  
2 for biological processes involving RNA metabolisms, such as mRNA splicing,  
3 translation initiation and nonsense mediated decay. Consistently, these  
4 proteins are also enriched for RNA binding domains such as RNA recognition  
5 motif (RRM), RNA binding domain (RBD), ATPase dependent RNA helicase  
6 (Helicase\_C) (Fig. 3A, left). The significant involvement of PRMT substrates in  
7 RNA metabolism supported the previous reports that many proteins with  
8 methylarginine modification participate in RNA processing (Guo et al. 2014;  
9 Larsen et al. 2016). In addition, the PRMT-interacting proteins that do not  
10 overlap with previously reported methylarginine-containing proteins are likely  
11 to be the regulator of PRMTs rather than their substrates (e.g. WDR77), and  
12 these proteins are enriched for RNA-unrelated functions, such as cell division  
13 and cell-cell adhesion (Fig. 3A, right).

14 We further examined protein-protein interactions among the potential  
15 substrates of each PRMT using STRING database, and found that the two  
16 largest and most densely connected clusters primarily consisted of proteins  
17 involved in RNA splicing and translation, including a large number of ribosomal  
18 proteins and splicing factors (Fig. 3B). Although the potential substrates of  
19 different PRMTs showed distinct clustering pattern, such dramatic functional  
20 clustering in splicing and translation are universal across different PRMTs (Fig.  
21 S4). In addition, we found that the core ribosomal proteins and the splicing  
22 factors identified in our study generally have a significantly higher frequency of

- 1 arginine in their amino acid composition as compared to all human proteins
- 2 (Fig. 3C), further supporting the prevalent methylarginine modification
- 3 observed in these proteins.

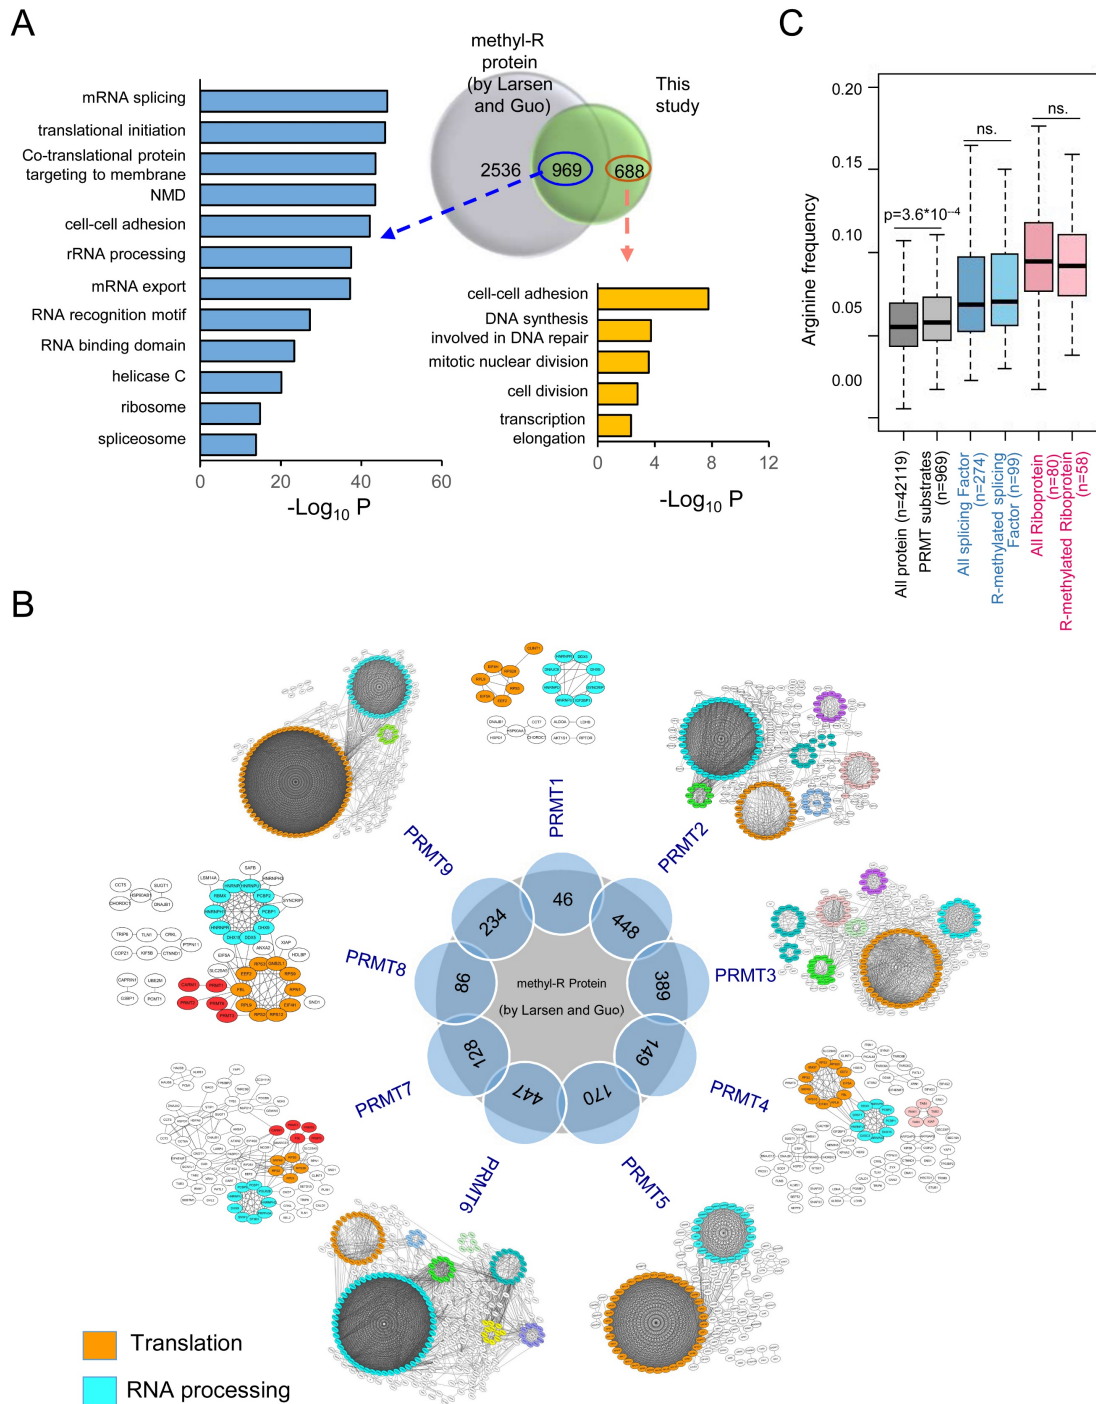

- 4
- 5
- 6 **Figure 3. Arginine methylation is highly involved in RNA splicing and translation.**

1 (A) Gene Ontology analysis (by DAVID) of the 969 putative PRMT substrates detected in both this study  
2 and previously identified methylarginine-containing proteins (blue bar), as well as the 688 PRMT  
3 interacting proteins identified in only this study (orange bar). (B) The putative PRMT substrates were  
4 subjected to protein-protein interaction analysis from the STRING database (v10.5, the minimum  
5 required interaction score was set to high confidence at 0.7), the resulting networks were clustered by  
6 MCODE in Cytoscape software. The orange nodes indicate functions related to translation and the cyan  
7 nodes indicate functional enrichment in RNA processing. (C) Arginine frequency of splicing  
8 factors/splicing factors containing methylarginine (blue) as well as core ribosomal proteins/ribosomal  
9 protein containing methylarginine (red) in their amino acid composition compared to all human proteins,  
10 Wilcoxon test was used to calculate the  $p$ -value.

11

## 12 **PRMT inhibitions generally altered alternative splicing of RNA**

13 The majority of human genes undergo alternative splicing (AS) that is  
14 generally regulated by various RNA-binding proteins (i.e., splicing factors) that  
15 recognize regulatory *cis*-elements to promote or suppress the use of adjacent  
16 splice sites (Matera and Wang 2014). It was previously reported that some  
17 PRMTs (e.g., PRMT4 and PRMT5) can affect splicing by modifying selected  
18 splicing factors or proteins involved in spliceosome maturation (Cheng et al.  
19 2007; Kuhn et al. 2011; Bezzi et al. 2013). Since many proteins involved in  
20 splicing regulation were identified as PRMT substrates (Fig. 3B and Fig. S4),  
21 we further examined the effect of PRMT inhibition on alternative RNA splicing.  
22 We achieved effective gene silence with shRNAs in six different PRMTs (Fig.  
23 S5A) and examined their effect on splicing using RNA-seq (Fig. 4A). For  
24 each PRMT we identified the alternative splicing events that are significantly  
25 altered in cells with PRMT knockdown compared to the control cells with  
26 scramble RNAi (Fig. 4A).



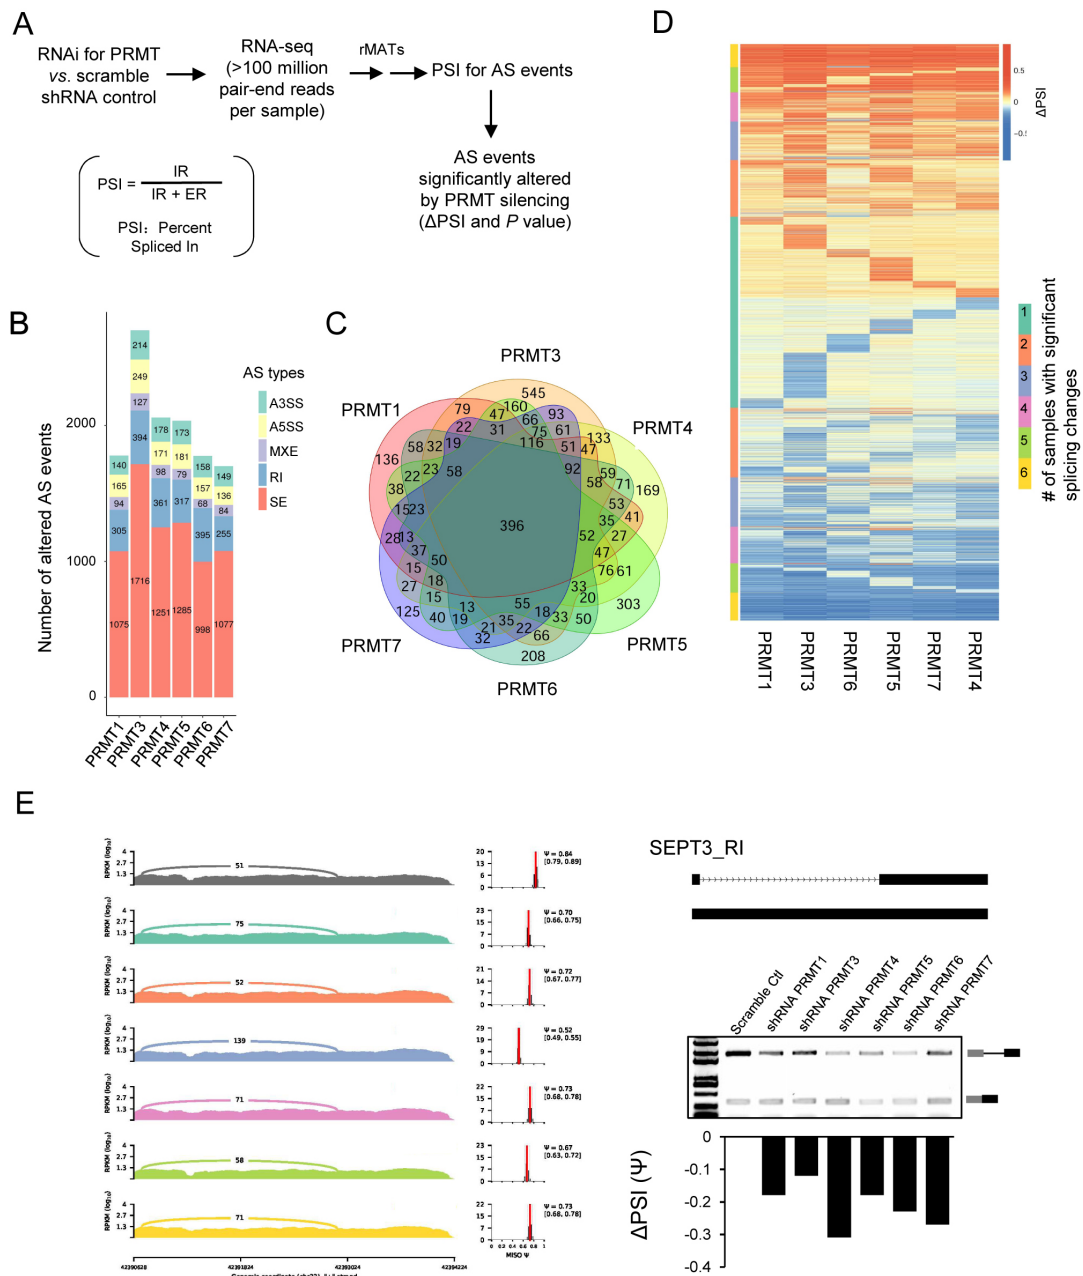

**Figure 4. PRMT inhibition leads to global alteration of alternative splicing.**

(A) The workflow of RNA splicing analysis for PRMT knockdown samples using RNA-seq and analyzed by MISO pipeline to calculate PSI (percent spliced in) values. We used  $|\Delta\text{PSI}| > 0.1$  and read counts  $> 50$  as the cutoff to identified significantly altered splicing events. (B) The count of different types of altered splicing events after PRMT knockdown. A3SS, alternative 3' splice site; A5SS, alternative 5' splice site; MXE, mutually exclusive exon; RI, retained intron; SE, skipped exon. (C) The intersection of altered AS events upon silencing of different PRMTs. (D) All AS events altered upon silencing of each PRMT were colored according to  $\Delta\text{PSI}$ . The AS events were also clustered by the numbers of PRMT RNAi samples with the significant splicing changes (e.g., the clusters labeled in yellow include AS events affected by RNAi of all the six PRMTs tested). (E) Experimental validation of splicing alteration. Sashimi plot of splicing change in SEPT3 was presented in the left, including the counts of junction read, the PSI value and its confidence interval. Semi-quantitative PCR was shown in the right. Additional examples of altered AS events can be found in fig. S5B

1 We found that inhibition of different PRMTs caused significant changes of  
2 splicing in hundreds of genes harboring various AS types (Fig. 4B). Many of  
3 AS events are affected by the inhibition of more than one PRMT (i.e., large  
4 overlaps between splicing targets of different PRMTs), suggesting that the  
5 arginine methylation of proteins by PRMTs play a general role to regulate  
6 alternative splicing (Fig. 4C). Interestingly, the inhibition of different PRMTs  
7 generally had similar effects on splicing of specific genes (i.e., the  $\Delta$ PSI are  
8 either positive or negative in most affected genes, Fig. 4D), implying that the  
9 arginine methylation of same RNA-binding proteins by different PRMTs  
10 produces similar effects on their activities. The splicing changes of selected AS  
11 events were further validated using semi-quantitative RT-PCR. For example,  
12 the splicing of a retained intron in SEPT3 (neuronal-specific septin-3) gene is  
13 promoted by inhibition of all six PRMTs tested (Fig. 4E), and many other genes  
14 have undergone alteration of splicing in the same direction (Fig. S5B),  
15 supporting the consistent regulation of splicing by different PRMTs.

16

### 17 **Ribosomal proteins are pervasively arginine methylated**

18 According to the gene ontology and protein-protein interaction analyses,  
19 proteins involved in mRNA translation are significantly enriched in the newly  
20 identified PRMT substrates, including >72% core components of ribosomes  
21 (58 out of 80 ribosome proteins) and many canonical translation factors (such  
22 as EIF4G1, EIF4B, EIF2A, etc.). In table S2, we listed all the 80 ribosome

1 proteins with newly identified interacting PRMTs and the putative  
2 methylarginine sites. Our finding is consistent with earlier reports in the late  
3 1970s that both subunits of the ribosome contain methyl arginine as judged by  
4 chromatography of short peptides or amino acid residues originated from  
5 ribosomal proteins (Chang et al. 1976; Goldenberg and Eliceiri 1977; Kruiswijk  
6 et al. 1978). More recently, several ribosomal proteins were also reported to  
7 contain methylarginine, including yeast RPL12 and RPS2 (Polevoda and  
8 Sherman 2007) and human RPS3 and RPS10 (Shin et al. 2009; Ren et al.  
9 2010). Our finding revealed a prevalent arginine methylation in core ribosomal  
10 proteins, suggesting that this type of PTM plays critical roles in protein  
11 translation.

12 To directly test this hypothesis, we performed polysome profiling to isolate  
13 different ribosome fractions (the 40S, 60S, 80S, and polysome, Fig. 5A) and  
14 detect their methylation status by pan-arginine methylation antibodies (Fig. 5B).  
15 Our data demonstrated that ribosomal proteins (most having a MW range of  
16 10-50 kD) are pervasively R-methylated in different ribosome profiling fractions  
17 (Fig. 5B). We also found that PRMTs were not co-purified with ribosomes  
18 (Fig 5A), suggesting that the methylation of ribosomal proteins occurs before  
19 ribosome assembly, which is consistent with the absence of PRMTs from the  
20 known ribo-interactome (Simsek et al. 2017). In addition, we used different  
21 types of methylarginine antibodies (MMA, aDMA and sDMA antibodies) to  
22 precipitate proteins containing methylarginine and detected many ribosomal

1 proteins in the immunoprecipitated samples (Fig. 5C), further supporting our  
 2 conclusion that ribosome proteins are pervasively methylated at arginine  
 3 residues.

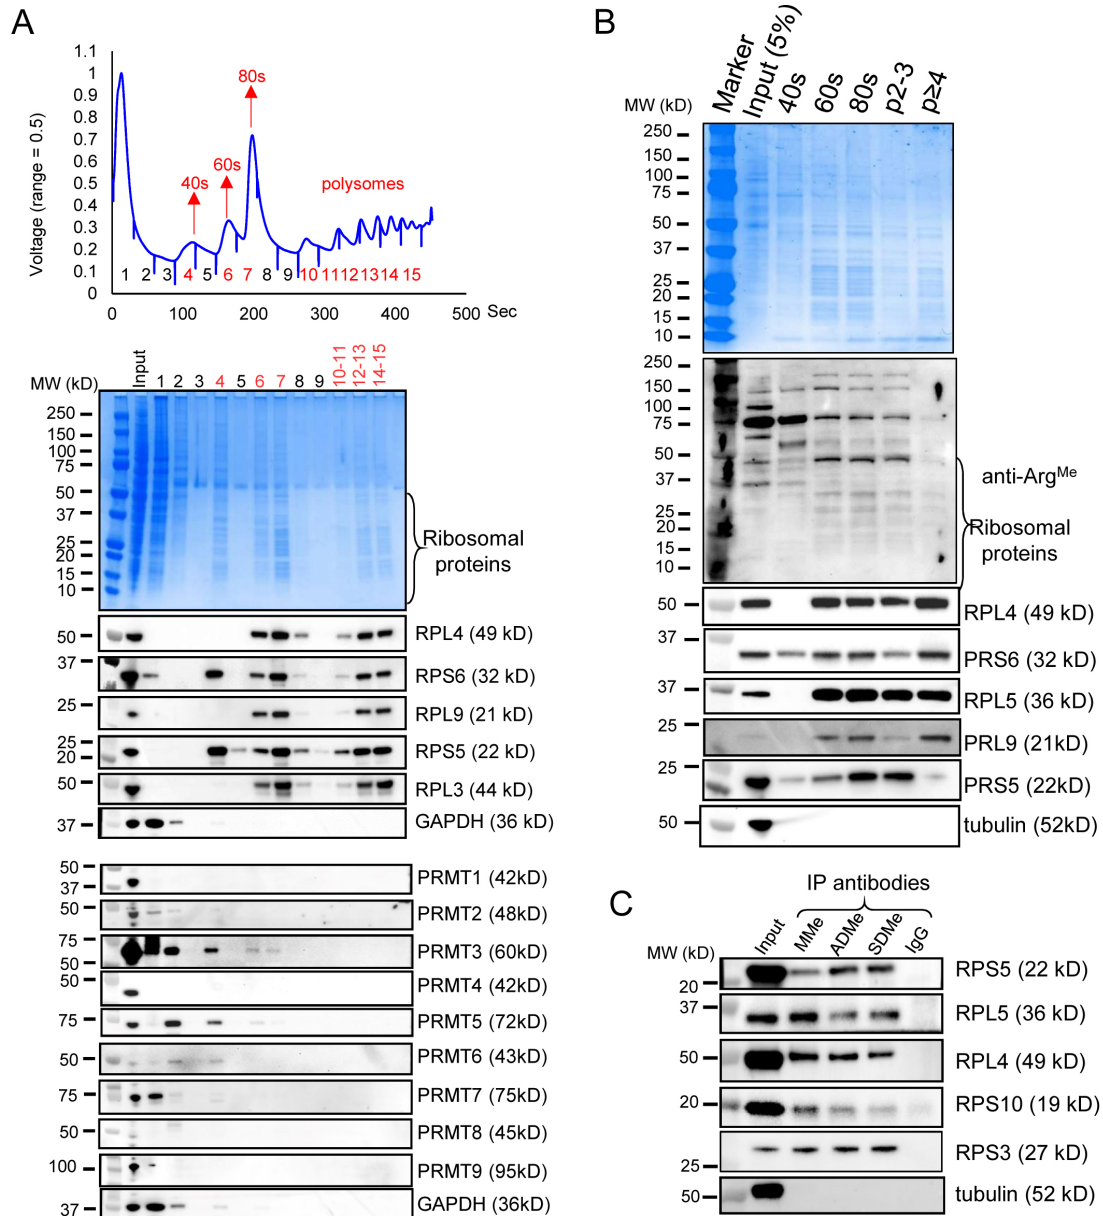

4  
 5 **Figure 5. Ribosomal proteins are pervasively methylated.**

6 (A) Fractionation of polysomes using HEK293T cell lysis. Each fraction was collected, and proteins in  
 7 each fraction were precipitated for SDS-PAGE assay. Both coomassie blue staining (top) and western  
 8 blots (bottom) were used to detect the proteins in each fraction. Accumulation of ribosomal proteins can  
 9 be observed on the gel (MW between 15-50 kD, Middle). (B) The arginine methylation of ribosomal  
 10 proteins as detected by combination of pan-methylarginine antibodies that can recognize MMA, aDMA  
 11 and sDMA. (C) The HEK293T cell lysate were subjected to immunoprecipitation with different  
 12 methylarginine antibodies, and the selected ribosomal proteins were detected with western blot.

## 1 **Arginine methylation is critical for assembly and function of ribosomes**

2       Based on the pervasive arginine methylation of ribosomal proteins and  
3 translation factors, we hypothesize that PRMT inhibition may affect translation  
4 on a global scale. Consistent with this idea, PRMT3 was reported to directly  
5 contact with RPS2 and responsible for the homeostasis of the ribosome in a  
6 methyltransferase-independent manner (Perreault et al. 2009). To test this  
7 hypothesis, we used puromycin incorporation assay to test global protein  
8 synthesis in three different types of cells after treatment by the PRMT specific  
9 inhibitors (Fig. 6A, Fig. S6A and S6B for cell lines HEK 293, HCT116 and  
10 U2OS, respectively). We used chemical inhibitors of PRMTs because they  
11 could provide a more rapid suppression of ribosomal activity that might  
12 otherwise be compensated in cells with stable knockdown of PRMTs.

13       We found that the inhibitors of PRMT1 and PRMT4/CARM1 effectively  
14 reduced arginine methylation and global protein synthesis across multiple cell  
15 lines (Fig. 6A and Fig. S6), and the inhibition of these two PRMTs produced  
16 the most obvious reduction in arginine methylation. Therefore, we selected  
17 PRMT1 and PRMT4 for further analyses of how PRMT activities affect  
18 translation. Using polysome profiling, we found that the inhibition of PRMT1 or  
19 PRMT4 effectively reduced the abundances of polysomes vs. monosomes (Fig.  
20 6B), suggesting a global reduction of mRNAs undergoing active translation.

21

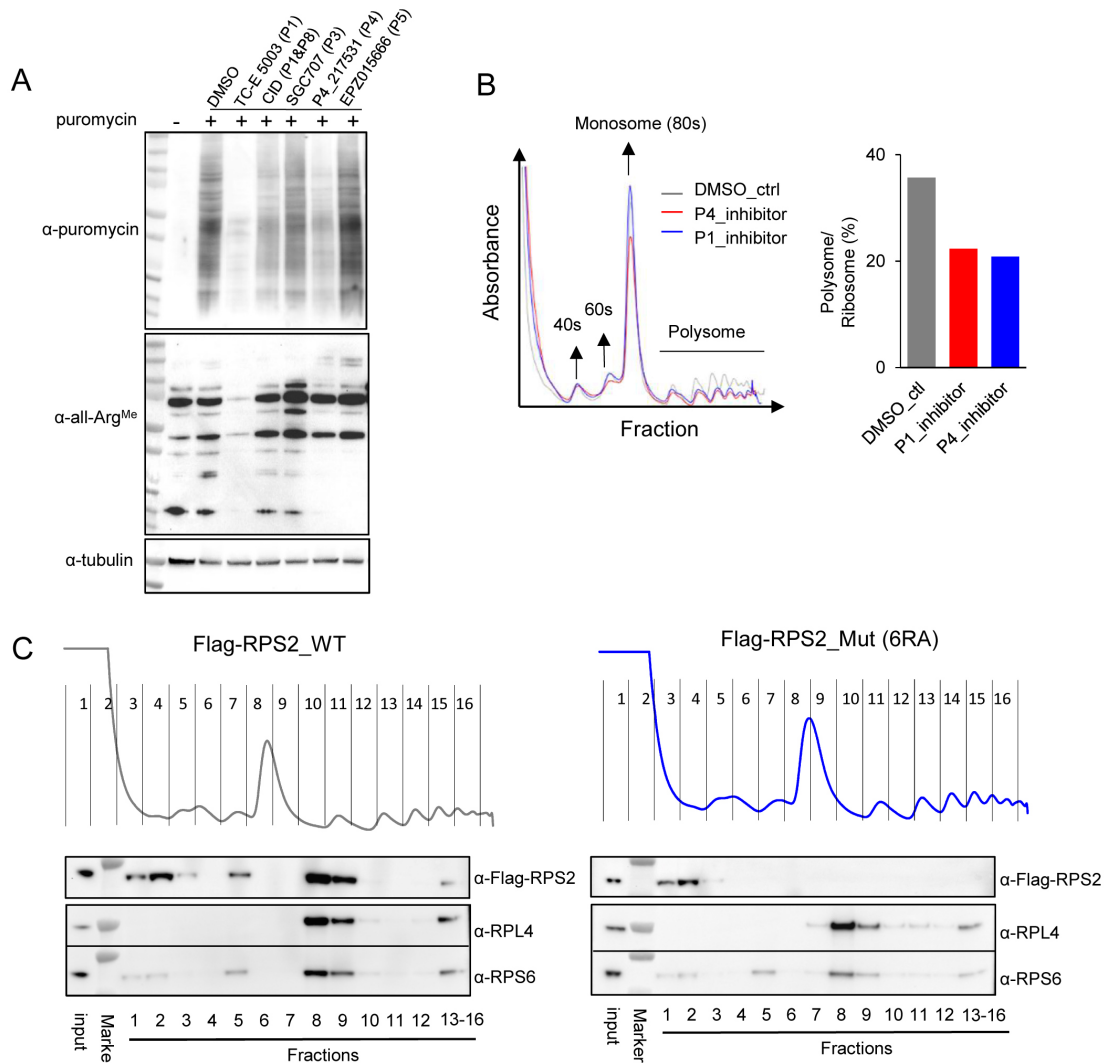

**Figure 6. Arginine methylation affects translation efficiency and assembly of ribosomal proteins.**

(A) Puromycin incorporation assay of translation efficiency upon inhibition of specific PRMTs. HEK293T cells were treated with different PRMT inhibitors for 24h, and puromycin was added 30 min before cell harvest. The incorporations of puromycin were detected by western blot using anti-puromycin antibody. The pan-methylarginine antibody was used to measure changes in arginine methylation status. (B) The effect of PRMT inhibition on ribosome fractions. The cells treated with PRMT1 and PRMT4 inhibitors were analyzed using polysome profiling, with the percent of monosome and polysomes calculated by the peak areas. (C) Arginine methylation of RPS2 affects ribosome assembly. Flag-RPS2 (WT) or Flag-RPS2 (6RA) was transfected into HEK293T cells for 24hr, followed by polysome profiling. Fractions were collected and used for western blotting with anti-Flag, anti-RPS6 and anti-RPL4 antibodies as indicated.

To further examine the potential mechanisms of how arginine methylation

affects mRNA translation, we selected the ribosomal protein RPS2, a newly

1 identified PRMT1 and PRMT4 substrate in our dataset, for more detailed study.  
2 RPS2 has an N-terminal GR-rich motif that is the consensus motif for efficient  
3 arginine methylation. We made mutations on the potential methylarginine  
4 sites (6RA, with 6 Arg to Ala substitution, see table S2) to examine if such  
5 mutations can affect the assembly of RPS2 into ribosome. Using polysome  
6 profiling followed by western blotting, we found that the cells transfected with  
7 Flag-tagged wide-type PRS2 can efficiently assemble Flag-RPS2 into  
8 ribosomes (in fractions of small subunit, monosome and polysomes), however  
9 the RPS2 with mutated methylarginine sites are completely depleted from all  
10 ribosomal fractions (Fig. 6C). Consistently, the deletion of the N-terminal  
11 GR-rich motif in RPS2 also cause depletion of PRS2 from the assembled  
12 ribosomes, suggest the arginine methylation in this region is critical for the  
13 assembly of this protein into ribosomes (Fig. S7).

14

### 15 **Inhibition of PRMT activity cause global translation deficiency**

16 To further examine how PRMT inhibitions affect the translation of different  
17 mRNAs, we sequenced the mRNA population associated with different  
18 ribosomal fractions after treatment of PRMT1 and PRMT4 inhibitors (Fig. 7A).  
19 Compared to the control samples treated with DMSO, the inhibition of PRMTs  
20 can significantly reduce the level of mRNAs bound by single ribosomes or  
21 polysomes (Fig. 7B). More specifically, among the 6783 protein-coding genes  
22 detected with reliable numbers of RNA-seq reads, 4392 mRNAs in the

1 PRMT1-inhibited sample (~65%) and 3830 mRNAs in the PRMT4-inhibited  
2 sample (~56%) showed a consistent decrease in the association with different  
3 ribosomal fractions (i.e., both monosome and polysomes), suggesting a  
4 general reduction of translation efficiency on most mRNAs (Fig. 7C).  
5 Interestingly, the GO analysis of these mRNAs failed to produce any functional  
6 enrichment (not shown), again suggesting a global reduction of mRNA  
7 translation rather than translation inhibition on a specific subgroup of mRNAs.

8 We next determined how PRMT inhibition affects translation of different  
9 mRNAs using Ribo-seq to measure the distribution of ribosome protected RNA  
10 fragments in control and PRMT inhibition samples (Fig. 7D). This analysis  
11 can generate a “snapshot” of all mRNAs that are occupied by active ribosomes  
12 (i.e., undergoing active translation) in a cell at a particular condition (Ingolia  
13 2016). As expected, the ribosome occupancy is higher in the coding region  
14 compared to the 5' and 3' UTRs upon normalized against average coverage  
15 (Fig. 7E). In addition, the binding of ribosomes on mRNA was slightly  
16 enriched in the region around the start codon and before the stop codon,  
17 suggesting a ribosome pausing after the initiation and the delayed ribosome  
18 release (Fig. 7E), which is also consistent with the ribosomal profiling results  
19 from other groups (reviewed in (Ingolia 2016)). Interestingly, we found that  
20 the inhibition of PRMT activity did not change the distribution of ribosome  
21 occupancy on different regions of mRNAs (Fig. 7E). Given the observation of  
22 translation reduction by PRMT inhibitions (Fig. 6A and 6B), this result again



- 1 suggested that PRMTs may affect the maturation of ribosomes before they are
- 2 assembled onto the mRNAs, consistent with our finding that arginine
- 3 methylation of ribosomal proteins is essential for ribosome assembly.

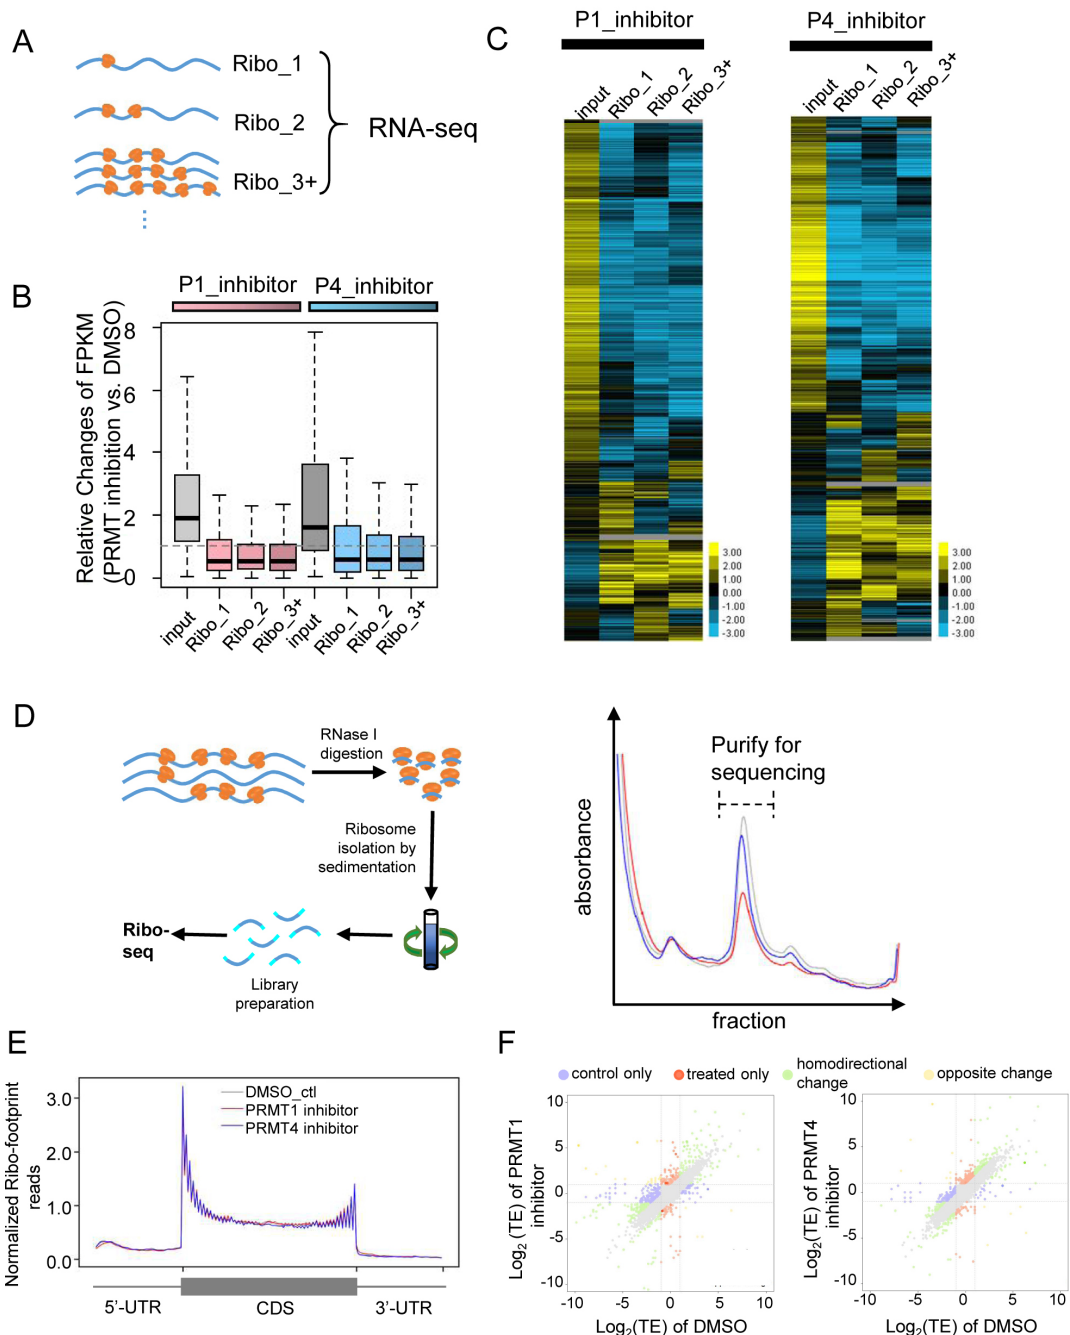

4

5

6 **Figure 7. The inhibition of PRMT activity leads to global translation deficiency in thousands of**  
 7 **genes.**

8 (A) Schematic diagram of experiments. Polysome profiling was performed to fractionate different

1 ribosome fractions upon treatment of PRMT inhibitors in HEK293T cells. The mRNAs bound to one  
2 ribosome (ribo\_1), two ribosome (ribo\_2) and more than three ribosomes (ribo\_3+) were collected and  
3 subjected to RNA-seq, respectively. (B) The relative FPKM changes of input mRNAs and  
4 ribosome-bound mRNAs (with PRMT1 and PRMT4 inhibition compared to DMSO control) were  
5 represented as box plot. (C) Hierarchical clustering of different mRNAs in the input and ribosome-bound  
6 fractions after treatment with PRMT1 and PRMT4 inhibitors. The log<sub>2</sub> fold change of each mRNA was  
7 calculated and hierarchically clustered. (D) The samples with PRMT1 and PRMT4 inhibition were treated  
8 with RNase I to collect ribosome protected RNAs for high-throughput sequencing (Ribo-seq assay). The  
9 schematic diagram of experiments (left) and the isolated ribosome fractions for sequencing (right) were  
10 shown. (E) Ribosome protected RNA reads were mapped to the human genome, with the number of  
11 ribosome footprint reads in the different region of transcripts being normalized by average coverage of  
12 each transcript. All transcripts were combined to plot the distribution of normalized reads along the  
13 transcript regions. (F) Changes of translation efficiency (TE) upon PRMT inhibition. The changes of each  
14 transcript were plotted as scatter plot (more significant p-values presented with darker color). Blue: genes  
15 with large TE changes only in control sample; Red: genes with large TE changes in PRMT1 or PRMT4  
16 inhibition sample; Green: genes with TE changes homodirectionally in two conditions; Yellow: genes with  
17 TE changes oppositely in two conditions.

18

19 We further determined the specific genes whose translation efficiency (TE)  
20 was preferably affected by PRMT inhibition by using Xtail pipeline (Xiao et al.  
21 2016) to measure the genes with significant TE change after PRMT inhibition  
22 (Fig. 7F). We found that the inhibition of PRMT1 significantly changed the TE  
23 of only eight coding genes, whereas the TE of 46 protein-coding genes was  
24 significantly altered upon inhibition of PRMT4 (Fig. 7F). Interestingly, among  
25 the 46 genes affected by PRMT4 inhibition, 25 ribosomal protein genes have  
26 significantly increased TE, suggesting a potential functional complementation  
27 after the translation suppression.

28

## 29 Discussion

30 As a common but relatively underappreciated PTM, the methylation of  
31 arginine has been found in many proteins with global identifications of

1 methylation sites (Boisvert et al. 2003; Ong et al. 2004; Pahlich et al. 2006).  
2 Many PRMTs were found to catalyze this type of PTM, however the  
3 relationship between PRMTs and their substrates were not established on a  
4 global scale. In this study, we have for the first time identified the putative  
5 substrates for each of the human PRMTs and further characterized the novel  
6 consensus methylation motifs for individual human PRMT. We found a high  
7 degree of overlap in substrate specificity of different PRMTs, as well as a  
8 significant enrichment for RNA binding proteins in the substrates of all PRMTs.  
9 In particular, the splicing factors and ribosomal proteins are heavily methylated  
10 and overrepresented in PRMT substrates, and consistently the inhibition of  
11 PRMTs leads to global deficiency of RNA translation. Collectively, the  
12 identification and characterization of substrates for all human PRMTs provide  
13 a foundation for further studies on their biological functions.

14 One interesting observation is that the majority of the consensus motifs for  
15 arginine methylation are short fragments with low sequence complexity,  
16 including the well known GR-rich motifs and newly identified SR- and PR- rich  
17 motifs (Fig. 2 and Fig. S2). Since low complexity domains (e.g., GR and  
18 SR-rich domain in RNA binding proteins) usually form a non-structural region,  
19 the recognition by PRMTs likely happens in the unstructured regions of  
20 proteins, suggesting a structure independent recognition, which is supportive  
21 to the promiscuous binding between PRMTs and many of their targets. This  
22 promiscuous binding may help to explain the high overlaps between the

1 binding partners of different PRMTs, suggesting a certain degree of functional  
2 complementation among PRMTs. Consistently, the knockout mice of most  
3 PRMTs have only mild phenotypes (Yang and Bedford 2013; Jeong et al. 2016;  
4 Penney et al. 2017), with the exception of PRMT1 and PRMT5 that cause  
5 lethal phenotype after knockout (Pawlak et al. 2000; Nicholson et al. 2009; Tee  
6 et al. 2010). Therefore we speculate that the additional specificity is provided  
7 by the spatial/temporal control of expression for PRMTs and their potential  
8 targets.

9 Arginine methylation usually increases protein hydrophobicity, thus may  
10 affect how proteins interact with their partners and assemble into a functional  
11 complex. Here we found that the core ribosomal proteins are among the  
12 largest protein groups recognized and methylated by PRMTs, raising the  
13 possibility that the methylarginine modification of ribosomal proteins can affect  
14 the assembly and function of ribosomes. It is well known that ribosome  
15 heterogeneity contributes to the regulation of mRNA translation (Genuth and  
16 Barna 2018; Emmott et al. 2019), and thus we expect that the methylarginine  
17 modification status of ribosomal proteins is a major source for ribosome  
18 heterogeneity. Here we proved that mutations on methylation sites of RPS2  
19 can inhibit its assembly into ribosomes, and found that inhibitions of certain  
20 PRMTs impose a global suppression on translation. Rather than affecting a  
21 specific step of translation, our data implied that the translation reduction may  
22 be caused by the defects of ribosome biogenesis before they are assembled

1 onto mRNA.

2       Although the ribosomal proteins are significantly enriched with arginine  
3 residue and are the most overrepresented targets of PRMTs, we speculate  
4 that they are differentially modified by different PRMTs. As a result, inhibition  
5 of different PRMTs affected the translation efficiency of distinct sets of mRNAs.  
6 More detailed analyses on how each PRMT differentially affects the assembly  
7 and functions of ribosomes will be an important subject for future studies.

8       Like many PTM, methylation of arginine also has the specific “readers”,  
9 “erasers” and “readers”. Although nine PRMTs were identified as  
10 methylarginine writer, so far there is only one “eraser protein”, JMJD6, was  
11 reported for methylarginine (Chang et al. 2007) and several proteins  
12 containing “Tudor” domains were proposed function as putative “reader”  
13 (Vagin et al. 2009; Kirino et al. 2010; Chen et al. 2011). We expect that the  
14 biological functions of methylarginine modification are probably determined by  
15 the networks consisting of different “writers”, “erasers”, “readers” and their  
16 substrates. Therefore, mapping such interacting network will provide useful  
17 information on the function of arginine methylation in various proteins. This  
18 study represents a start point for a comprehensive mapping of a network  
19 containing methylarginine “writers”, “erasers”, “readers” and their substrates,  
20 and thus may serve as a foundation and reference for future research on this  
21 topic.

22

1 **Materials and Methods (see supplemental methods for more**  
2 **detailed information)**

3 **Resources**

4 Antibodies: Detailed information for antibodies applied in this study is  
5 listed in Table S3.

6 Cell lines: HEK293T, HCT116 and U2OS cells were cultured according to  
7 instructions of American Type Culture Collection (ATCC). The cell lines have  
8 been authenticated in GENEWIZ and has been tested to have no mycoplasma  
9 contamination by mycoplasma contamination test kit (C0296, Beyotime).

10 Tools: software, databases and services were available in supplemental  
11 methods.

12

13 **Plasmids**

14 For identification of interacting proteins of each PRMT, Human  
15 PRMT1-PRMT9 were amplified by PCR and inserted into the  
16 pcDNA3.1-BirA-HA plasmid (#36047, Addgene). For *in vitro* methylation,  
17 3×Flag-tagged PRMTs (PRMT1 to PRMT9) were inserted into  
18 pcDNA3.1-3×Flag plasmids. For ribosome assembly, Flag-tagged hRPS2  
19 were generated by PCR from human cDNA and inserted in frame with  
20 pcDNA3.1-Flag. The RPS2 mutants with arginine to alanine substitution  
21 (R22/26/34/36/227/279A, 6RA) and with deletion of GR-rich motif (amino acids  
22 34-53) were generated by site directed mutagenesis.

## 1 **Identification of interacting proteins for each PRMT**

2 Human PRMT1-PRMT9 were amplified by PCR and inserted into the  
3 pcDNA3.1-BirA plasmid. The BioID experiments were performed as described  
4 in Roux et al. (Roux et al. 2012) with minor modifications. Briefly, the HEK293T  
5 cells transiently expressing PRMT-BirA fusion proteins were collected and  
6 lysed, and the protein complexes were purified using streptavidin beads. The  
7 resulting protein mixture was further separated through HPLC using a  
8 homemade 15 cm-long pulled-tip analytical column, and analyzed using mass  
9 spectrometry. The acquired MS/MS data were compared to the UniProt  
10 database using Integrated Proteomics Pipeline. A decoy database containing  
11 the reversed sequences of all the proteins was appended to the target  
12 database to accurately estimate peptide probabilities and false discovery rate  
13 (FDR), and FDR was set at 0.01.

14

## 15 **Motif enrichment analysis**

16 We retrieved the full sequences of all identified interactors of each PRMT  
17 from the UniProt database. We counted all tetrapeptide with arginine amino  
18 acid at each position (candidate PRMT's binding sites) and calculated the  
19 frequency of each tetrapeptide in each PRMT interactome and compared with  
20 the background tetrapeptide frequency of all human proteins from UniProt  
21 database. The enrichment score of each tetrapeptide was calculated as Z  
22 score based on published methods (Fairbrother et al. 2002). We collected all

1 motifs with enrichment score larger than 4 and motif number larger than 6 as  
2 an input of clustalw2 (v2.0.9) to generate a phylogenetic tree, then clustered  
3 these motifs based on branch length and modified manually to ensure the  
4 similar motifs in one class. Finally, we used Weblogo3 (WebLogo: A sequence  
5 logo generator) to draw the consensus sequence of each cluster.

6

### 7 ***In vitro* methylation and MS detection of arginine methylated peptides**

8 The HEK293T cells transiently overexpressing 3×Flag-tagged PRMT  
9 were lysed, and the overexpressed proteins were purified using Anti-FLAG M2  
10 Magnetic Beads. *In vitro* methylation assay was carried out according to  
11 Cheng et al (Cheng et al. 2012) with minor modifications. Peptide substrates  
12 containing predicted motifs and recombinant enzyme (on beads) were  
13 incubated in the presence of S-Adenosyl-L-methionine (AdoMet). The reaction  
14 mixture was further separated through HPLC using a homemade analytical  
15 column and analyzed using mass spectrometry. The acquired MS/MS data  
16 were analyzed on a homemade database including all target peptides with  
17 Integrated Proteomics Pipeline (IP2, <http://integratedproteomics.com/>) and  
18 pFind (version 3.1.3 (Chi et al. 2018)). Methylation and dimethylation were  
19 set as a dynamic modification with mass shift at 14.01565 and 28.0313,  
20 respectively. For each peptide, the sum of the peak areas from the TIC values  
21 of the modified peptides was divided by the peak area of the reference  
22 unmodified peptide and this value was used as a relative index of the



1 methylation and dimethylation.

2

### 3 **Generation of stable cell lines**

4 Production of lentivirus was carried out according to Addgene pLKO.1  
5 protocol. Scramble shRNA and PRMT shRNA sequences were listed in Table  
6 S3. Lentiviruses were packaged by transfection of three plasmids (pLKO.1,  
7 psPAX2, and pMD2.G.) into HEK293T cells, and the stably transfected cells  
8 were selected with puromycin for at least two weeks. The knockdown  
9 efficiency was determined by PRMT antibodies.

10

### 11 **RNA-seq**

12 HEK293T cells stably transfected with scramble shRNA or shRNAs  
13 against PRMT were harvested in Trizol reagent and RNAs were extracted  
14 according to the manufacturer's protocol. Poly(A)+ RNA-seq libraries were  
15 prepared by using Illumina TruSeq Stranded mRNA LT Sample Prep Kit  
16 (Illumina) and subjected to deep sequencing with Illumina HiSeq X10 under  
17 PE150 sequencing model.

18

### 19 **Immunoprecipitation and substrate validation**

20 The lysate of HEK293T cells was separated into trisection and incubated  
21 with ADme-, SDme- and Mme- arginine antibody, respectively. The A/G  
22 PLUS-Agarose beads (Santa Cruz) were used for immunoprecipitation of

1 methylarginine-containing substrates. The candidate substrates (ribosomal  
2 proteins) were detected via western blot.

3

#### 4 **Polysome profiling**

5 Polysome profiling was carried out according to Lin et al. and Vyas et al.  
6 (Vyas et al. 2009; Lin et al. 2010). DMSO or Inhibitor-treated HEK293T cells  
7 were lysed in polysome lysis buffer. The lysates were loaded onto 10-50%  
8 sucrose gradients and ultracentrifuged. Fractions were collected using a  
9 Brandel Density Gradient Fractionation System. Samples were precipitated  
10 with Methanol/chloroform method according to Sucrose Gradient Separation  
11 Protocol (<http://www.mitosciences.com/PDF/sg.pdf>). The protein precipitate  
12 was assayed by western blot to detect arginine methylation status using  
13 combined anti-methylarginine antibody. Meanwhile, ribosomal proteins and  
14 PRMTs were also detected via western blot (antibodies listed in Table S3).

15

#### 16 **RNA-seq of polysome profiling fractions**

17 mRNAs from indicated fractions of polysome profiling samples were  
18 extracted with TriZol reagent. RNA-seq libraries were prepared by  
19 NEBNext®EUItra™ II Directional RNA Library Prep Kit for Illumina (NEB) and  
20 subjected to deep sequencing with Illumina Hiseq X10 under PE150  
21 sequencing model.

22

## 1 **Measurement of global protein synthesis by puromycin incorporation**

2 HEK293T, HCT116 and U2OS cells were incubated with specific inhibitors  
3 (see Table S3) against several PRMTs. Subsequently, puromycin  
4 incorporation assay was performed according to Kelleher et al. (Kelleher et al.  
5 2013). Puromycin was added to the medium of inhibitor-treated cells 30 min  
6 before harvest. An equal quantity of protein lysates was separated on  
7 SDS/PAGE and probed with anti-puromycin antibody (Millipore).

8

## 9 **Ribosome footprint**

10 Cleared cell lysates from polysome profiling procedure were treated with  
11 RNase I to obtain ribosome-protected mRNA fragments (RPF). Subsequently,  
12 lysates were loaded onto 10-50% sucrose gradients, ultracentrifuged and  
13 fractionated as described above. Fractions containing monoribosome particles  
14 were combined and undergone RNA clean-up by TriZol reagent. The RNA  
15 sequencing library was prepared according to Ingolia et al. (Ingolia et al. 2012)  
16 with some modifications. The RPF library was prepared as described in  
17 Illumina Small RNA Library Prep Reference Guide. RNA samples were  
18 reverse-transcribed and cDNA libraries were gel purified and amplified by  
19 limited-cycle PCR with index primers. Libraries were cleaned up and subjected  
20 to next-generation sequencing on Illumina Hiseq X10.

21

## 22 **Bioinformatics analyses**

1       The R package GeneOverlap was used to test the significance of  
2 substrates overlap between different PRMTs, with total number of interacting  
3 proteins identified in this study as the background. Gene Ontology (GO)  
4 analysis of putative PRMT substrates was performed using Database for  
5 Annotation, Visualization and Integrated Discovery (DAVID, v6.8), with total  
6 proteins in human genome as background. Protein-protein interactions were  
7 obtained from STRING database (Szklarczyk et al. 2015) with interaction  
8 score set to high confidence, then clustered by MCODE in Cytoscape  
9 software.

10       For analysis of alternative splicing, the RNA-seq reads were mapped onto  
11 the human genome reference (Ensembl GRCh37), and the PSI (Percent  
12 Spliced In) values were estimated using MISO and rMATs for each annotated  
13 splicing event. For significant change of splicing were filtered using FDR cutoff  
14 of 0.01, we also required the  $\Delta$ PSI cutoff at 0.1 with minimal read count at 50.

15       To analyze RNA-seq data after the polysome profiling, we trimmed the  
16 adaptors and low-quality bases of paired-end 150bp reads using Cutadapt  
17 (v1.18). The trimmed reads with length < 20 nt were excluded, and the  
18 remaining reads were mapped to the human genome (GRCh37 with  
19 annotation of GENCODE v27lift37) using STAR (v2.5.3a). Genes expression  
20 levels (FPKM) were estimated by RSEM, and the relative fold changes were  
21 calculated. The Hierarchical clustering of log<sub>2</sub> fold changes was carried out  
22 using Cluster 3.0 with centered correlation and average linkage parameter, the

1 heatmap was visualized by TreeView.

2 Ribo-seq data were analyzed according to Calviello et al. (Calviello et al.  
3 2016). The translation efficiency of each gene was estimated by dividing the  
4 TPM of ribosome-protected mRNA with the relative transcript abundance. For  
5 coverage plot, we scaled each transcript and divided 5'-UTR, CDS, and  
6 3'-UTR regions to 20, 100, and 50 windows, respectively. The average  
7 coverage in each window was normalized to mean coverage of the entire  
8 transcript. To assess the statistical changes of translation efficiency, Ribo-seq  
9 signals and RNA-seq signals were analyzed using Xtail pipeline (Xiao et al.  
10 2016), and the genes with adjusted  $p$ -values (less than 0.05) were used as  
11 differential translation efficiency genes.

12

### 13 **Acknowledgements**

14 We thank Han Yan at Omics Core of Bio-Med Big Data Center, CAS-MPG  
15 Partner Institute for Computational Biology (PICB), for assistance with  
16 next-generation sequencing. We also thank Yu-Jie Chen at Uli Schwarz  
17 Quantitative Biology Core Facility, PICB, for experimental support with this  
18 study. We thank Dr. YanZhong Yang and Prof. Mark T. Bedford at the  
19 University of Texas MD Anderson Cancer Center for their generous gift of  
20 several PRMT plasmids.

1 **Declarations**

2 **Ethics approval and consent to participate**

3 There is no human participants or animal models used in this work. All the  
4 experiments using biological samples are conducted according to the  
5 regulation of biosafety laws in China.

6 **Consent for publication**

7 Not applicable

8 **Availability of data and material**

9 All sequencing data during the current study are available in The National  
10 Omics Data Encyclopedia (NODE) data depository  
11 (<http://www.biosino.org/node/project/detail/OEP000307>), with open access  
12 after publication.

13 Antibodies and other resources used in this study were listed in Table S3.

14 **Competing interests**

15 The authors declare that they have no competing interests.

16 **Funding**

17 This work was supported by National Natural Science Foundation of China  
18 (NSFC grant #31570823, #31661143031, and #31730110) and a grant from  
19 Science and Technology Commission of Shanghai Municipality (STCSM grant  
20 # 17JC1404900) to Z.W. It was also supported by an NSFC grant #91753135  
21 to Y.Y.. H.H.W. is supported by a scholarship from the Science and

1 Technology Commission of Shanghai Municipality (STCSM grant #  
2 18XD1404400)

3 **Authors' contributions**

4 H.H.W. and Z.W. conceived the project. H.H.W. and M.G. carried out the  
5 molecular and biochemical experiments. X.J.F., Y.H., and Z.Y.F analyzed the  
6 RNA-seq and Ribo-seq data as well as did other bioinformatic analyses. P.W.,  
7 S.X.G., X.X.T, and C.P. conducted mass spectrometry experiments. X.J.F., Y.  
8 H., Y.Y., H.H.W, and Z.W. were responsible for study design and interpretation  
9 of data. All authors were involved in drafting the manuscript and revising it  
10 critically for important intellectual content.

11

## 1   **References**

- 2   Baldwin GS, Carnegie PR. 1971. Specific enzymic methylation of an arginine in the experimental  
3       allergic encephalomyelitis protein from human myelin. *Science* **171**: 579-581.
- 4   Bedford MT. 2007. Arginine methylation at a glance. *J Cell Sci* **120**: 4243-4246.
- 5   Bedford MT, Clarke SG. 2009. Protein arginine methylation in mammals: who, what, and why.  
6       *Molecular cell* **33**: 1-13.
- 7   Bedford MT, Richard S. 2005. Arginine methylation an emerging regulator of protein function.  
8       *Molecular cell* **18**: 263-272.
- 9   Bezzi M, Teo SX, Muller J, Mok WC, Sahu SK, Vardy LA, Bonday ZQ, Guccione E. 2013. Regulation of  
10       constitutive and alternative splicing by PRMT5 reveals a role for Mdm4 pre-mRNA in sensing  
11       defects in the spliceosomal machinery. *Genes & development* **27**: 1903-1916.
- 12   Blanc RS, Richard S. 2017. Arginine Methylation: The Coming of Age. *Molecular cell* **65**: 8-24.
- 13   Boisvert FM, Cote J, Boulanger MC, Richard S. 2003. A proteomic analysis of arginine-methylated  
14       protein complexes. *Mol Cell Proteomics* **2**: 1319-1330.
- 15   Calviello L, Mukherjee N, Wyler E, Zauber H, Hirsekorn A, Selbach M, Landthaler M, Obermayer B,  
16       Ohler U. 2016. Detecting actively translated open reading frames in ribosome profiling data.  
17       *Nat Methods* **13**: 165-170.
- 18   Chang B, Chen Y, Zhao Y, Bruick RK. 2007. JMJD6 is a histone arginine demethylase. *Science* **318**:  
19       444-447.
- 20   Chang FN, Navickas IJ, Chang CN, Dancis BM. 1976. Methylation of Ribosomal-Proteins in Hela-Cells.  
21       *Archives of Biochemistry and Biophysics* **172**: 627-633.
- 22   Chen C, Nott TJ, Jin J, Pawson T. 2011. Deciphering arginine methylation: Tudor tells the tale. *Nature*  
23       *reviews Molecular cell biology* **12**: 629-642.
- 24   Cheng D, Cote J, Shaaban S, Bedford MT. 2007. The arginine methyltransferase CARM1 regulates the  
25       coupling of transcription and mRNA processing. *Molecular cell* **25**: 71-83.
- 26   Cheng D, Vemulapalli V, Bedford MT. 2012. Methods applied to the study of protein arginine  
27       methylation. *Methods Enzymol* **512**: 71-92.
- 28   Chi H, Liu C, Yang H, Zeng W-F, Wu L, Zhou W-J, Wang R-M, Niu X-N, Ding Y-H, Zhang Y et al. 2018.  
29       Comprehensive identification of peptides in tandem mass spectra using an efficient open  
30       search engine. *Nature Biotechnology* **36**: 1059.
- 31   Emmott E, Jovanovic M, Slavov N. 2019. Ribosome Stoichiometry: From Form to Function. *Trends in*  
32       *biochemical sciences* **44**: 95-109.
- 33   Fairbrother WG, Yeh RF, Sharp PA, Burge CB. 2002. Predictive identification of exonic splicing  
34       enhancers in human genes. *Science* **297**: 1007-1013.
- 35   Feng Y, Maity R, Whitelegge JP, Hadjikyriacou A, Li Z, Zurita-Lopez C, Al-Hadid Q, Clark AT, Bedford MT,  
36       Masson JY et al. 2013. Mammalian protein arginine methyltransferase 7 (PRMT7) specifically  
37       targets RXR sites in lysine- and arginine-rich regions. *The Journal of biological chemistry* **288**:  
38       37010-37025.
- 39   Frankel A, Clarke S. 2000. PRMT3 is a distinct member of the protein arginine N-methyltransferase  
40       family. Conferral of substrate specificity by a zinc-finger domain. *The Journal of biological*  
41       *chemistry* **275**: 32974-32982.
- 42   Gary JD, Clarke S. 1998. RNA and protein interactions modulated by protein arginine methylation.  
43       *Prog Nucleic Acid Re* **61**: 65-131.



- 1 Genuth NR, Barna M. 2018. The Discovery of Ribosome Heterogeneity and Its Implications for Gene  
2 Regulation and Organismal Life. *Molecular cell* **71**: 364-374.
- 3 Goldenberg CJ, Eliceiri GL. 1977. Methylation of Ribosomal-Proteins in Hela-Cells. *Biochimica et*  
4 *biophysica acta* **479**: 220-234.
- 5 Goulet I, Gauvin G, Boisvenue S, Cote J. 2007. Alternative splicing yields protein arginine  
6 methyltransferase 1 isoforms with distinct activity, substrate specificity, and subcellular  
7 localization. *The Journal of biological chemistry* **282**: 33009-33021.
- 8 Guo A, Gu H, Zhou J, Mulhern D, Wang Y, Lee KA, Yang V, Aguiar M, Kornhauser J, Jia X et al. 2014.  
9 Immunoaffinity enrichment and mass spectrometry analysis of protein methylation. *Mol Cell*  
10 *Proteomics* **13**: 372-387.
- 11 Huang da W, Sherman BT, Lempicki RA. 2009a. Bioinformatics enrichment tools: paths toward the  
12 comprehensive functional analysis of large gene lists. *Nucleic acids research* **37**: 1-13.
- 13 Huang da W, Sherman BT, Lempicki RA. 2009b. Systematic and integrative analysis of large gene lists  
14 using DAVID bioinformatics resources. *Nat Protoc* **4**: 44-57.
- 15 Ingolia NT. 2016. Ribosome Footprint Profiling of Translation throughout the Genome. *Cell* **165**: 22-33.
- 16 Ingolia NT, Brar GA, Rouskin S, McGeachy AM, Weissman JS. 2012. The ribosome profiling strategy for  
17 monitoring translation in vivo by deep sequencing of ribosome-protected mRNA fragments.  
18 *Nat Protoc* **7**: 1534-1550.
- 19 Jeong HJ, Lee HJ, Vuong TA, Choi KS, Choi D, Koo SH, Cho SC, Cho H, Kang JS. 2016. Prmt7 Deficiency  
20 Causes Reduced Skeletal Muscle Oxidative Metabolism and Age-Related Obesity. *Diabetes* **65**:  
21 1868-1882.
- 22 Kakimoto Y. 1971. Methylation of arginine and lysine residues of cerebral proteins. *Biochimica et*  
23 *biophysica acta* **243**: 31-37.
- 24 Kelleher AR, Kimball SR, Dennis MD, Schilder RJ, Jefferson LS. 2013. The mTORC1 signaling repressors  
25 REDD1/2 are rapidly induced and activation of p70S6K1 by leucine is defective in skeletal  
26 muscle of an immobilized rat hindlimb. *Am J Physiol-Endoc M* **304**: E229-E236.
- 27 Kirino Y, Vourekas A, Sayed N, de Lima Alves F, Thomson T, Lasko P, Rappsilber J, Jongens TA,  
28 Mourelatos Z. 2010. Arginine methylation of Aubergine mediates Tudor binding and germ  
29 plasm localization. *RNA* **16**: 70-78.
- 30 Kruiswijk T, Kunst A, Planta RJ, Mager WH. 1978. Modification of yeast ribosomal proteins.  
31 Methylation. *The Biochemical journal* **175**: 221-225.
- 32 Kuhn P, Chumanov R, Wang Y, Ge Y, Burgess RR, Xu W. 2011. Automethylation of CARM1 allows  
33 coupling of transcription and mRNA splicing. *Nucleic acids research* **39**: 2717-2726.
- 34 Larsen SC, Sylvestersen KB, Mund A, Lyon D, Mullari M, Madsen MV, Daniel JA, Jensen LJ, Nielsen ML.  
35 2016. Proteome-wide analysis of arginine monomethylation reveals widespread occurrence  
36 in human cells. *Science signaling* **9**: rs9.
- 37 Lin CJ, Robert F, Sukarieh R, Michnick S, Pelletier J. 2010. The antidepressant sertraline inhibits  
38 translation initiation by curtailing mammalian target of rapamycin signaling. *Cancer research*  
39 **70**: 3199-3208.
- 40 Matera AG, Wang Z. 2014. A day in the life of the spliceosome. *Nature reviews Molecular cell biology*  
41 **15**: 108-121.
- 42 Nicholson TB, Chen T, Richard S. 2009. The physiological and pathophysiological role of  
43 PRMT1-mediated protein arginine methylation. *Pharmacol Res* **60**: 466-474.
- 44 Ong SE, Mittler G, Mann M. 2004. Identifying and quantifying in vivo methylation sites by heavy

- 1 methyl SILAC. *Nat Methods* **1**: 119-126.
- 2 Pahlich S, Zakaryan RP, Gehring H. 2006. Protein arginine methylation: Cellular functions and methods  
3 of analysis. *Biochimica et biophysica acta* **1764**: 1890-1903.
- 4 Paik WK, Kim S. 1970. Omega-N-methylarginine in protein. *The Journal of biological chemistry* **245**:  
5 88-92.
- 6 Pawlak MR, Scherer CA, Chen J, Roshon MJ, Ruley HE. 2000. Arginine N-methyltransferase 1 is  
7 required for early postimplantation mouse development, but cells deficient in the enzyme  
8 are viable. *Molecular and cellular biology* **20**: 4859-4869.
- 9 Peng C, Wong CC. 2017. The story of protein arginine methylation: characterization, regulation, and  
10 function. *Expert Rev Proteomics* **14**: 157-170.
- 11 Penney J, Seo J, Kritskiy O, Elmsaouri S, Gao F, Pao PC, Su SC, Tsai LH. 2017. Loss of Protein Arginine  
12 Methyltransferase 8 Alters Synapse Composition and Function, Resulting in Behavioral  
13 Defects. *J Neurosci* **37**: 8655-8666.
- 14 Perreault A, Gascon S, D'Amours A, Aletta JM, Bachand F. 2009. A methyltransferase-independent  
15 function for Rmt3 in ribosomal subunit homeostasis. *The Journal of biological chemistry* **284**:  
16 15026-15037.
- 17 Polevoda B, Sherman F. 2007. Methylation of proteins involved in translation. *Mol Microbiol* **65**:  
18 590-606.
- 19 Poulard C, Corbo L, Le Romancer M. 2016. Protein arginine methylation/demethylation and cancer.  
20 *Oncotarget* doi:10.18632/oncotarget.11376.
- 21 Ren J, Wang Y, Liang Y, Zhang Y, Bao S, Xu Z. 2010. Methylation of ribosomal protein S10 by  
22 protein-arginine methyltransferase 5 regulates ribosome biogenesis. *The Journal of biological  
23 chemistry* **285**: 12695-12705.
- 24 Roux KJ, Kim DI, Burke B. 2013. BioID: a screen for protein-protein interactions. *Curr Protoc Protein Sci*  
25 **74**: Unit 19 23.
- 26 Roux KJ, Kim DI, Burke B, May DG. 2018. BioID: A Screen for Protein-Protein Interactions. *Curr Protoc  
27 Protein Sci* **91**: 19 23 11-19 23 15.
- 28 Roux KJ, Kim DI, Raida M, Burke B. 2012. A promiscuous biotin ligase fusion protein identifies proximal  
29 and interacting proteins in mammalian cells. *Journal of Cell Biology* **196**: 801-810.
- 30 Saha K, Adhikary G, Eckert RL. 2016. MEP50/PRMT5 Reduces Gene Expression by Histone Arginine  
31 Methylation and this Is Reversed by PKCdelta/p38delta Signaling. *The Journal of investigative  
32 dermatology* **136**: 214-224.
- 33 Shin HS, Jang CY, Kim HD, Kim TS, Kim S, Kim J. 2009. Arginine methylation of ribosomal protein S3  
34 affects ribosome assembly. *Biochemical and biophysical research communications* **385**:  
35 273-278.
- 36 Shishkova E, Zeng H, Liu F, Kwiecien NW, Hebert AS, Coon JJ, Xu W. 2017. Global mapping of CARM1  
37 substrates defines enzyme specificity and substrate recognition. *Nature communications* **8**:  
38 15571.
- 39 Simsek D, Tiu GC, Flynn RA, Byeon GW, Leppek K, Xu AF, Chang HY, Barna M. 2017. The Mammalian  
40 Ribo-interactome Reveals Ribosome Functional Diversity and Heterogeneity. *Cell* **169**:  
41 1051-1065 e1018.
- 42 Stuhlinger MC, Tsao PS, Her JH, Kimoto M, Balint RF, Cooke JP. 2001. Homocysteine impairs the nitric  
43 oxide synthase pathway: role of asymmetric dimethylarginine. *Circulation* **104**: 2569-2575.
- 44 Sylvestersen KB, Horn H, Jungmichel S, Jensen LJ, Nielsen ML. 2014. Proteomic Analysis of Arginine

- 1 Methylation Sites in Human Cells Reveals Dynamic Regulation During Transcriptional Arrest.  
2 *Molecular & Cellular Proteomics* **13**: 2072-2088.
- 3 Szklarczyk D, Franceschini A, Wyder S, Forslund K, Heller D, Huerta-Cepas J, Simonovic M, Roth A,  
4 Santos A, Tsafou KP et al. 2015. STRING v10: protein-protein interaction networks, integrated  
5 over the tree of life. *Nucleic acids research* **43**: D447-452.
- 6 Tang J, Gary JD, Clarke S, Herschman HR. 1998. PRMT 3, a type I protein arginine N-methyltransferase  
7 that differs from PRMT1 in its oligomerization, subcellular localization, substrate specificity,  
8 and regulation. *Journal of Biological Chemistry* **273**: 16935-16945.
- 9 Tee WW, Pardo M, Theunissen TW, Yu L, Choudhary JS, Hajkova P, Surani MA. 2010. Prmt5 is essential  
10 for early mouse development and acts in the cytoplasm to maintain ES cell pluripotency.  
11 *Genes & development* **24**: 2772-2777.
- 12 Thandapani P, O'Connor TR, Bailey TL, Richard S. 2013. Defining the RGG/RG motif. *Molecular cell* **50**:  
13 613-623.
- 14 Vagin VV, Wohlschlegel J, Qu J, Jonsson Z, Huang X, Chuma S, Girard A, Sachidanandam R, Hannon GJ,  
15 Aravin AA. 2009. Proteomic analysis of murine Piwi proteins reveals a role for arginine  
16 methylation in specifying interaction with Tudor family members. *Genes & development* **23**:  
17 1749-1762.
- 18 Vyas K, Chaudhuri S, Leaman DW, Komar AA, Musiyenko A, Barik S, Mazumder B. 2009. Genome-wide  
19 polysome profiling reveals an inflammation-responsive posttranscriptional operon in gamma  
20 interferon-activated monocytes. *Molecular and cellular biology* **29**: 458-470.
- 21 Xiao Z, Zou Q, Liu Y, Yang X. 2016. Genome-wide assessment of differential translations with ribosome  
22 profiling data. *Nature communications* **7**: 11194.
- 23 Yang Y, Bedford MT. 2013. Protein arginine methyltransferases and cancer. *Nat Rev Cancer* **13**: 37-50.
- 24
